# Supplementary material
Source: Springer Nature journal article supplement (https://www.springermedizin.de/resource/supplementary/12985_2008_474_MOESM4_ESM.pdf/9607830)

**A.**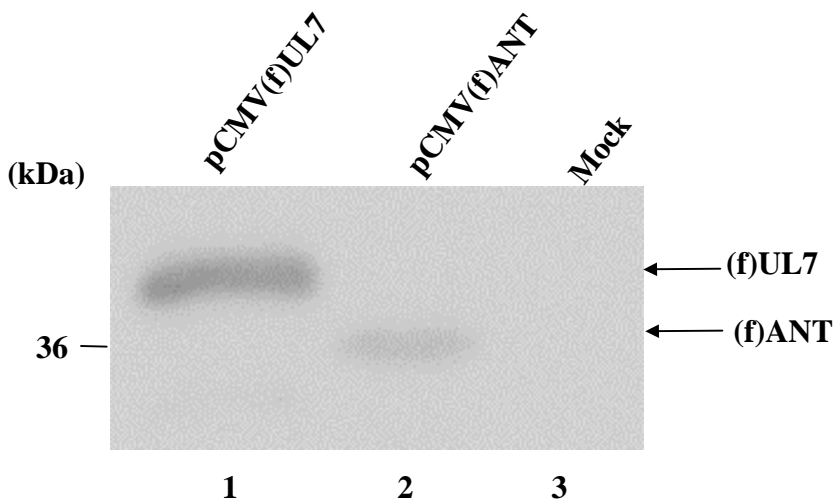**B.**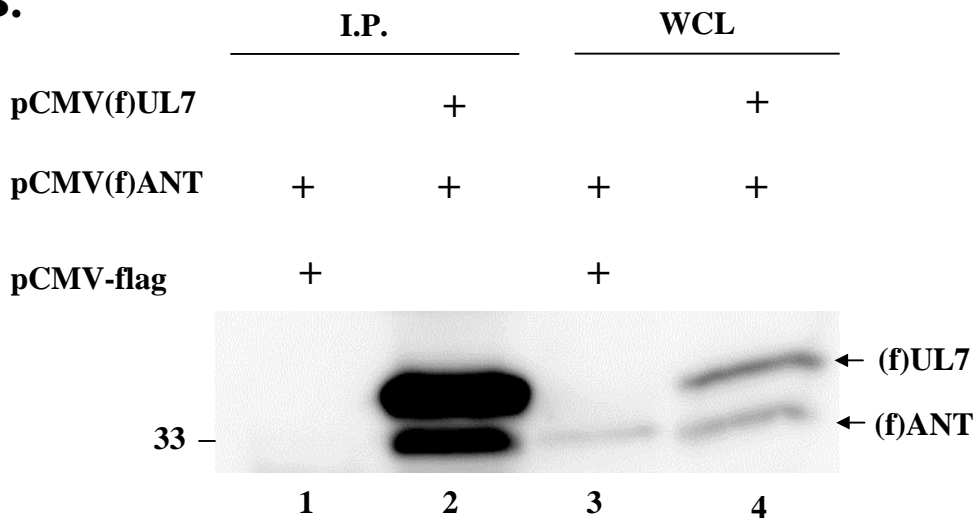

Supplement: MOESM4 [file 9607830]
